# Supplementary material
Source: HighWire-hosted journal article supplement (https://bmjopen.bmj.com/content/9/8/e027563)
Supplement: inline-supplementary-material-1 [file inline-supplementary-material-1.pdf]

## Supplement A: Post-Hoc Power

Post-hoc power was calculated for the non-inferiority test e using nQuery Version 8.4.0.0 (Stat. Solutions Ltd. & South Bank, Crosses Green, Cork, Ireland). Results are shown in table 2, input values are listed in table 3. Descriptive statistics (see table 3) were calculated using EquivTest (StatCon GmbH, Witzenhausen, Germany).

The nQuery output was:

When the sample sizes in the groups are 9 and 8, a two group one-sided 0.05 significance level t-test will have 22.26 % power to reject the null hypothesis that the test [(performance of supported non-professionals)] is inferior to the standard [(performance of unsupported professionals)] in favor of the alternative hypothesis that the treatment [(support of non-professionals)] is non-inferior [(to no support of professionals)], assuming that the expected difference in means is 0, a non-inferiority margin of 1 and the common standard deviation is 2.23.

|                                                        | realistic  | optimistic |
|--------------------------------------------------------|------------|------------|
| Test Significance Level, $\alpha$ (one-sided)          | 0.050      | 0.050      |
| Non-Inferiority Limit Difference $\Delta_0$            | 1.000      | 1.000      |
| Expected Difference, $\Delta_1$                        | 0.000      | 0.000      |
| Difference of Deltas, $\Delta_0 - \Delta_1$            | 1.000      | 1.000      |
| Common Standard Deviation, $\sigma$                    | 2.230      | 1.770      |
| Effect Size, $\delta =  \Delta_0 - \Delta_1  / \sigma$ | 0.448      | 0.565      |
| Power (%)                                              | 22.26 [80] | 29.65 [80] |
| Group 1 Sample Size, $n_1$                             | 9 [63]     | 9 [40]     |
| Group 2 Sample Size, $n_2$                             | 8 [63]     | 8 [40]     |
| Sample Size Ratio, $n_2/n_1$                           | 0.889 [1]  | 0.889 [1]  |
| Total Sample Size, $N = n_1 + n_2$                     | 17 [126]   | 17 [80]    |

Table 2: Post-hoc power calculation results for test e using model *MTE0U-1 / Two Group t-test of Non-Inferiority in Means Unequal n's*. The realistic power calculation assumes the common standard deviation  $\sigma$  found by pooling the two underlying standard deviations (see table 3). The optimistic power calculation assumes the smaller of the two underlying standard deviations (that of the group of supported non-professionals). To achieve a power of 80 % with  $\sigma = 2.230$  and sample size ration  $n_2/n_1 = 1$ , a total sample size of 126 would have been required. With a  $\sigma = 1.770$  and sample size ration  $n_2/n_1 = 1$ , a total sample size of 80 would have been required.

| Group                              | supported non-professionals | unsupported professionals |
|------------------------------------|-----------------------------|---------------------------|
| Mean                               | 11.8333                     | 10.6875                   |
| Standard Error (Mean)              | 0.5892                      | 0.9398                    |
| Geometric Mean                     | 11.7135                     | 10.3237                   |
| Median                             | 11.5000                     | 11.7500                   |
| Standard Deviation                 | 1.7677                      | 2.6583                    |
| Variance                           | 3.1250                      | 7.0669                    |
| Min                                | 9.0000                      | 5.5000                    |
| Max                                | 14.0000                     | 13.0000                   |
| Range                              | 5.0000                      | 7.5000                    |
| $n$                                | 9                           | 8                         |
| Common standard deviation $\sigma$ | 2.22998                     |                           |

Table 3: Descriptive statistics of the groups of supported non-professionals and unsupported professionals also used in test e (see results in figure 3). Common standard deviation was estimated by pooling standard deviations of both groups.
